# Supplementary material
Source: Springer Nature journal article supplement (https://www.springermedizin.de/resource/supplementary/12891_2009_782_MOESM1_ESM.pdf/9506998)
Supplement: MOESM1 [file 9506998]

Enrollment:  
Patients

Assessed for eligibility by phone  
(n=139)

Excluded (n=119)  
Did not meet inclusion criteria  
(n=116)  
Refused to participate (n=3)

Randomized  
(n = 20)

Allocation:  
Patients

Allocated to physiotherapy intervention  
(n=11)

Allocated to control group (n=9)

Allocation:  
Physiotherapists

Physiotherapists (n=4), centers (n=3)  
performing the intervention.

Treatment phase

10 x individual treatment sessions

Usual care – no physiotherapy treatment

Week 11  
Assessment:  
Patients

Lost to week 11 assessment (n=0)  
Discontinued intervention (concomitant  
injury, n=1)

Lost to week 11 assessment (n=0)

Analysis:  
Patients

Analyzed (n=11)  
Excluded from analysis (n=0)

Analyzed (n=9)  
Excluded from analysis (n=0)
